# Supplementary material for: Critical steps in clinical shotgun metagenomics for the concomitant detection and typing of microbial pathogens
Source: PubMed Central journal article supplement (PMC6137123; doi:10.1038/s41598-018-31873-w), 2018-09-13
Supplement: 41598_2018_31873_MOESM1_ESM.pdf [file 41598_2018_31873_MOESM1_ESM.pdf]

**Critical steps in clinical shotgun metagenomics for the concomitant detection and typing of microbial pathogen:**

Natacha Couto<sup>1</sup>, Leonard Schuele<sup>1,2</sup>, Erwin C. Raangs<sup>1</sup>, Miguel P. Machado<sup>3</sup>, Catarina I. Mendes<sup>1,3</sup>,  
Tiago F. Jesus<sup>3</sup>, Monika Chlebowicz<sup>1</sup>, Sigrid Rosema<sup>1</sup>, Mário Ramirez<sup>3</sup>, João A. Carriço<sup>3</sup>, Ingo B.  
Autenrieth<sup>2</sup>, Alex W. Friedrich<sup>1</sup>, Silke Peter<sup>2</sup>, John W. Rossen<sup>1</sup>

<sup>1</sup>University of Groningen, University Medical Center Groningen, Department of Medical Microbiology, Groningen, The Netherlands;

<sup>2</sup>Institute of Medical Microbiology and Hygiene, University of Tübingen, Germany;

<sup>3</sup>Instituto de Microbiologia, Instituto de Medicina Molecular, Faculdade de Medicina, Universidade de Lisboa, Portugal.

\*Corresponding Author: Natacha Couto; Email: n.monge.gomes.do.couto@umcg.nl; Address:  
University Medical Center Groningen, Department of Medical Microbiology EB80, Hanzeplein 1,  
P.O. Box 30.001, 9700 RB Groningen, The Netherlands.

|                                                                                          |                              |            |                |
|------------------------------------------------------------------------------------------|------------------------------|------------|----------------|
| <b>FastQ Toolkit v2.2.0</b>                                                              | Done                         |            |                |
| Minimum read length                                                                      | 32                           |            |                |
| Sub-sampling                                                                             | FALSE                        |            |                |
| Adapter trim stringency                                                                  | 0.9                          |            |                |
| Select respective adapters                                                               | TRUE                         |            |                |
| Quality trimming                                                                         | FALSE                        |            |                |
| Poly-A/T Trimming                                                                        | FALSE                        |            |                |
| Read Filtering                                                                           | FALSE                        |            |                |
| Modify Reads                                                                             | FALSE                        |            |                |
| Fix Format                                                                               | FALSE                        |            |                |
| <b>FastQC v1.0.0</b>                                                                     |                              |            |                |
| Kmer Size                                                                                | 5                            |            |                |
| Use Conatminant Filter                                                                   | TRUE                         |            |                |
| <b>Kraken Metagenomics v1.0.0</b>                                                        |                              |            |                |
| Host Filter                                                                              | TRUE                         | RefSeqhg19 |                |
| Classification Database:                                                                 | MiniKraken 20141208 (latest) |            |                |
| Filter Threshold                                                                         | 0                            |            |                |
| <b>Metaphlan v1.0.0</b>                                                                  |                              |            |                |
| Sensitivity options for read-marker similarity (as descibed by BowTie2)                  |                              |            | Very Sensitive |
| <b>SPAdes Genome Assembler v3.9.0</b>                                                    |                              |            |                |
| Running Mode:                                                                            | Error Correction & Assembly  |            |                |
| Dataset type                                                                             | Multi Cell                   |            |                |
| Careful Mode                                                                             | Disable                      |            |                |
| k-mer lengths                                                                            | Auto                         |            |                |
| <b>SEAR: Antibiotic Resistance v1.0.0</b>                                                |                              |            |                |
| Read length cutoff (bases)                                                               | 70                           |            |                |
| Read quality score cutoff                                                                | 20                           |            |                |
| Read subtraction against E.coli reference genome (K12)?                                  | No                           |            |                |
| Clustering stringency (express % as a decimal)                                           | 0.98                         |            |                |
| Annotation stringency (% length of reference ARG sequence mapped to by sequencing reads) |                              |            | 40             |
| <b>GENIUS Metagenomics: Know Now v1.1.0</b>                                              |                              |            |                |
| Can't set any settings in BaseSpace                                                      |                              |            |                |

|                                                                             |                                                       |       |      |
|-----------------------------------------------------------------------------|-------------------------------------------------------|-------|------|
| Trim Reads                                                                  |                                                       |       |      |
| Trimmomatic v0.36 (INNUca v2.6 initial module)                              |                                                       |       |      |
| Quality trim                                                                |                                                       | TRUE  |      |
| Phred Quality limit                                                         |                                                       |       | 5:20 |
| Trim adapter list                                                           | Illumina adapters                                     |       |      |
| Remove 5' terminal nucleotides                                              |                                                       | TRUE  |      |
| Number of 5' terminal nucleotides                                           |                                                       |       | 3    |
| Remove 3' terminal nucleotides                                              |                                                       | TRUE  |      |
| Number of 3' terminal nucleotides                                           |                                                       |       | 3    |
| Discard short reads                                                         |                                                       | TRUE  |      |
| Minimum number of nucleotides in reads                                      |                                                       |       | 55   |
| Map Reads to Reference                                                      |                                                       |       |      |
| Bowtie2 v2.3.2                                                              |                                                       |       |      |
| References                                                                  | Homo sapiens (hg19) index                             |       |      |
| Mode                                                                        | end-to-end                                            |       |      |
| Mode option                                                                 | sensitive                                             |       |      |
| Collect unmapped reads                                                      |                                                       | TRUE  |      |
| Taxonomic classification                                                    |                                                       |       |      |
| Kraken v0.10.5-beta                                                         |                                                       |       |      |
| References                                                                  | miniKraken database (Dec. 8, 2014)                    |       |      |
| K-mer length                                                                |                                                       |       | 35   |
| MIDAS                                                                       |                                                       |       |      |
| References                                                                  | midas_db_v1.2 (May 9, 2018)                           |       |      |
| Word size for blast                                                         |                                                       |       | 28   |
| Alignment coverage                                                          |                                                       |       | 0.75 |
| MetaPhlan2 v2.0                                                             |                                                       |       |      |
| References                                                                  | default database (May 9, 2018)                        |       |      |
| Minimum total nucleotide length for the markers                             |                                                       |       | 2000 |
| Quantile value for robust average                                           |                                                       |       | 0.1  |
| Statistical approach for converting marker abundances into clade abundances | clade global                                          |       |      |
| Analysis type                                                               | profiling a metagenome in terms of relative abundance |       |      |
| Identify MLST                                                               |                                                       |       |      |
| metaMLST v1.1                                                               |                                                       |       |      |
| References                                                                  | metamlstDB_2017                                       |       |      |
| Bowtie2 mode                                                                | local                                                 |       |      |
| Bowtie2 mode option                                                         | very sensitive local                                  |       |      |
| Collect unmapped reads                                                      |                                                       | FALSE |      |
| Search for and report all alignment                                         |                                                       | TRUE  |      |
| Find Resistance Genes                                                       |                                                       |       |      |
| ReMatCh v3.2                                                                |                                                       |       |      |
| References                                                                  | ResFinder database (29-06-2017)                       |       |      |
| Minimum coverage to consider a position as present                          |                                                       |       | 1    |
| Minimum coverage depth to perform a basecall                                |                                                       |       | 1    |
| Minimum gene coverage (%)                                                   |                                                       |       | 80   |
| Minimum gene identity (%)                                                   |                                                       |       | 70   |
| De novo assembly                                                            |                                                       |       |      |
| SPAdes v3.10.1                                                              |                                                       |       |      |
| Mode                                                                        | careful                                               |       |      |
| Error correction                                                            |                                                       | FALSE |      |
| Read coverage cut-off value                                                 |                                                       |       | 2    |
| List of K-mers                                                              | 21,33,55,67,77                                        |       |      |
| Plasmid Detection                                                           |                                                       |       |      |
| Bowtie2 v2.3.2                                                              |                                                       |       |      |
| References                                                                  | NCBI RefSeq (May 11, 2017)                            |       |      |
| Mode                                                                        | end-to-end                                            |       |      |
| Mode option                                                                 | sensitive                                             |       |      |
| Collect unmapped reads                                                      |                                                       | FALSE |      |
| Multiple alignment                                                          |                                                       | TRUE  |      |

|                                        |                                                |       |      |
|----------------------------------------|------------------------------------------------|-------|------|
| Illumina                               |                                                |       |      |
| Discard sequence names                 |                                                | FALSE |      |
| Discard quality scores                 |                                                | FALSE |      |
| Selected files                         |                                                |       |      |
| Paired-end reads                       |                                                | TRUE  |      |
| ReadOrientation                        | Forward Reverse                                |       |      |
| minimum distance                       |                                                |       | 1    |
| maximum distance                       |                                                |       | 1000 |
| Remove failed reads                    |                                                | TRUE  |      |
| Quality score                          | NCBI/Sanger or Illumina Pipeline 1.8 and later |       |      |
| MiSeq de-multiplexing                  |                                                | FALSE |      |
| Illumina trim                          |                                                | FALSE |      |
| Trim Reads                             |                                                |       |      |
| Quality trim                           |                                                | TRUE  |      |
| Quality limit                          |                                                |       | 0.05 |
| Ambiguous trim                         |                                                | TRUE  |      |
| Ambiguous limit                        |                                                |       | 2    |
| Trim adapter list                      | Illumina adapters                              |       |      |
| Use colorspace                         |                                                | FALSE |      |
| Remove 5' terminal nucleotides         |                                                | FALSE |      |
| Number of 5' terminal nucleotides      |                                                |       | 1    |
| Remove 3' terminal nucleotides         |                                                | FALSE |      |
| Number of 3' terminal nucleotides      |                                                |       | 1    |
| Discard short reads                    |                                                | TRUE  |      |
| Minimum number of nucleotides in reads |                                                |       | 30   |
| Discard long reads                     |                                                | FALSE |      |
| Maximum number of nucleotides in reads |                                                |       | 1000 |
| Map Reads to Reference                 |                                                |       |      |
| References                             | Homo sapiens (hg19) sequence                   |       |      |
| Masking mode                           | No masking                                     |       |      |
| Masking track                          |                                                |       |      |
| Match score                            |                                                |       | 1    |
| Mismatch cost                          |                                                |       | 2    |
| Cost of insertions and deletions       | Linear gap cost                                |       |      |
| Insertion cost                         |                                                |       | 3    |
| Deletion cost                          |                                                |       | 3    |
| Insertion open cost                    |                                                |       | 6    |
| Insertion extend cost                  |                                                |       | 1    |
| Deletion open cost                     |                                                |       | 6    |
| Deletion extend cost                   |                                                |       | 1    |
| Length fraction                        |                                                |       | 0.5  |
| Similarity fraction                    |                                                |       | 0.8  |
| Global alignment                       |                                                | FALSE |      |
| Color space alignment                  |                                                | TRUE  |      |
| Color error cost                       |                                                |       | 3    |
| Auto-detect paired distances           |                                                | TRUE  |      |
| Non-specific match handling            | Map randomly                                   |       |      |
| Find Best Matches using K-mer Spectra  |                                                |       |      |

|                                              |                                           |          |
|----------------------------------------------|-------------------------------------------|----------|
| References                                   | NCBI references (2017-07-08)              |          |
| K-mer length                                 |                                           | 16       |
| Only index k-mers with prefix                | ATGAC                                     |          |
| Check for low quality and contamination      | TRUE                                      |          |
| Fraction of unmapped reads for quality check |                                           | 0.1      |
| De Novo Assembly                             |                                           |          |
| Mapping mode                                 | Create simple contig sequences (fast)     |          |
| Update contigs                               | TRUE                                      |          |
| Mismatch cost                                |                                           | 2        |
| Insertion cost                               |                                           | 3        |
| Deletion cost                                |                                           | 3        |
| Colorspace error cost                        |                                           | 3        |
| Length fraction                              |                                           | 0.5      |
| Similarity fraction                          |                                           | 0.8      |
| Colorspace alignment                         | TRUE                                      |          |
| Alignment mode                               | local                                     |          |
| Match mode                                   | random                                    |          |
| Create list of un-mapped reads               | FALSE                                     |          |
| Automatic bubble size                        | TRUE                                      |          |
| Bubble size                                  |                                           | 50       |
| Automatic word size                          | TRUE                                      |          |
| Word size                                    |                                           | 20       |
| Minimum contig length                        |                                           | 200      |
| Guidance only reads                          |                                           |          |
| Perform scaffolding                          | TRUE                                      |          |
| Auto-detect paired distances                 | TRUE                                      |          |
| Create report                                | TRUE                                      |          |
| Find Resistance                              |                                           |          |
| DB                                           | Database for Find Resistance (2018-02-02) |          |
| Minimum identity %                           |                                           | 70       |
| Minimum length %                             |                                           | 20       |
| Filter overlaps                              | TRUE                                      |          |
| Local Realignment                            |                                           |          |
| Realign unaligned ends                       | TRUE                                      |          |
| Multi-pass realignment                       |                                           | 2        |
| Guidance-variant track                       |                                           |          |
| Maximum guidance-variant length              |                                           | 100      |
| Force realignment to guidance-variants       | FALSE                                     |          |
| InDels and Structural Variants (2)           |                                           |          |
| P-Value threshold                            |                                           | 1.00E-04 |
| Maximum number of mismatches                 |                                           | 3        |
| Ignore broken pairs                          | TRUE                                      |          |
| Filter variants                              | FALSE                                     |          |
| Minimum number of reads                      |                                           | 2        |
| Minimum relative consensus coverage          |                                           | 0        |
| Minimum quality score                        |                                           | 0        |
| Restrict calling to target regions           |                                           |          |

|                                        |                                                |     |
|----------------------------------------|------------------------------------------------|-----|
| Local Realignment (2)                  |                                                |     |
| Realign unaligned ends                 | TRUE                                           |     |
| Multi-pass realignment                 |                                                | 2   |
| Guidance-variant track                 | Defined by: InDels and Structural Variants (2) |     |
| Maximum guidance-variant length        |                                                | 100 |
| Force realignment to guidance-variants | FALSE                                          |     |
| Identify MLST Scheme from Genomes      |                                                |     |
| Schemes                                | PubMLST (04-03-2017)                           |     |
| Identify MLST                          |                                                |     |
| Scheme                                 | Defined by: Identify MLST Scheme from Genomes  |     |
| Low coverage reported when below       |                                                | 30  |
